# Supplementary material for: Hyperspectral imaging sediment core scanning tracks high-resolution Holocene variations in (an)oxygenic phototrophic communities at Lake Cadagno, Swiss Alps
Source: Copernicus journal article supplement (doi:10.5194/bg-20-2221-2023), 2023-06-19
Supplement: Supplementary file 1 [file bg-20-2221-2023-supplement.pdf]

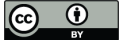

*Supplement of*

## **Hyperspectral imaging sediment core scanning tracks high-resolution Holocene variations in (an)oxygenic phototrophic communities at Lake Cadagno, Swiss Alps**

**Paul D. Zander et al.**

*Correspondence to:* Paul D. Zander (paul.zander@mpic.de)

The copyright of individual parts of the supplement might differ from the article licence.

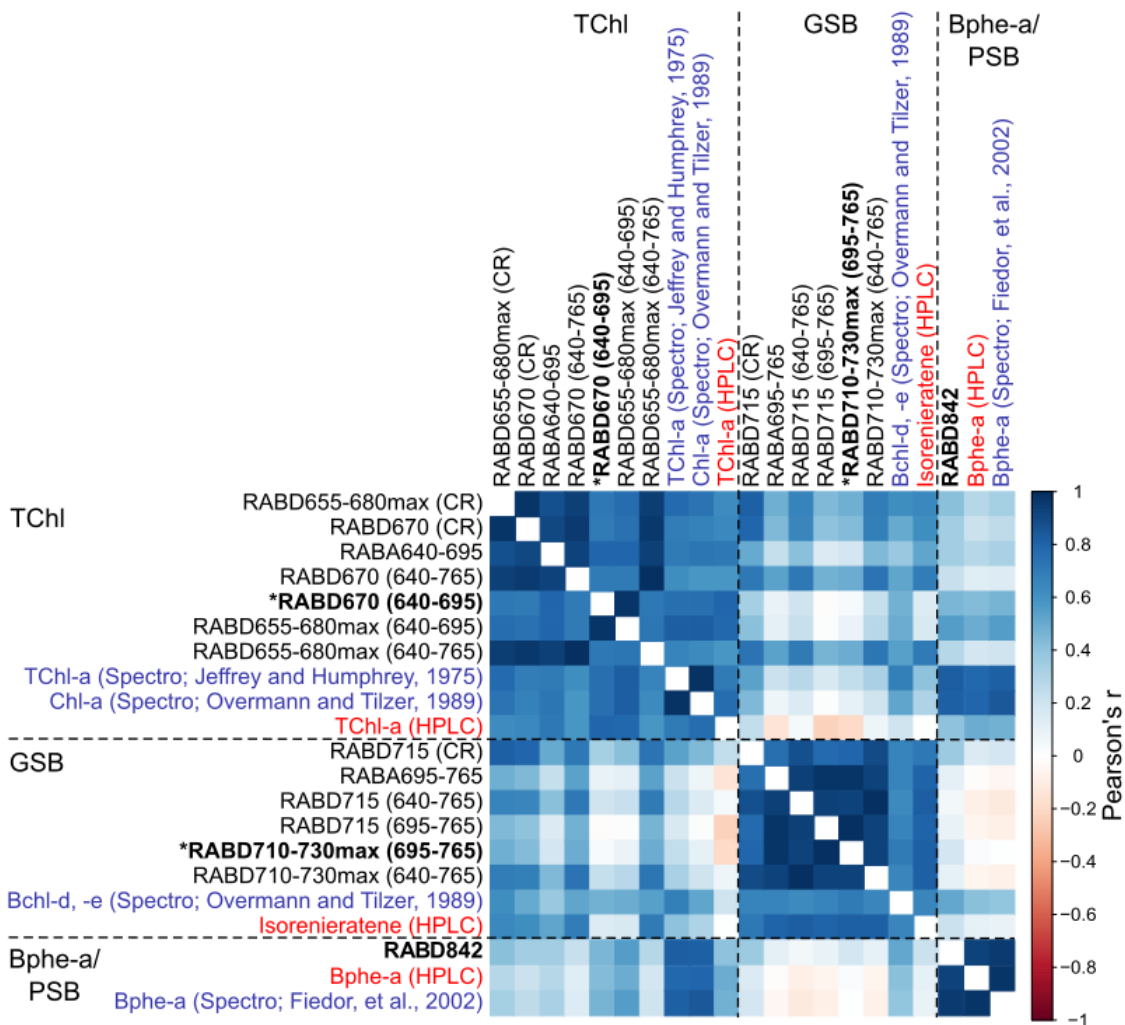

Figure S1: Correlation matrix comparing the similarity of various HSI index formulations and pigment measurements on extracted samples (n = 21). HSI indices are labeled in black text, spectrophotometer measurements with blue text, and HPLC measurements in red text. CR = continuum removal. RABA = relative absorption band area. Numbers given within parenthesis represent the wavelengths used as endpoints to define the absorption band trough. Correlation values used to make this figure are shown in Table S1.

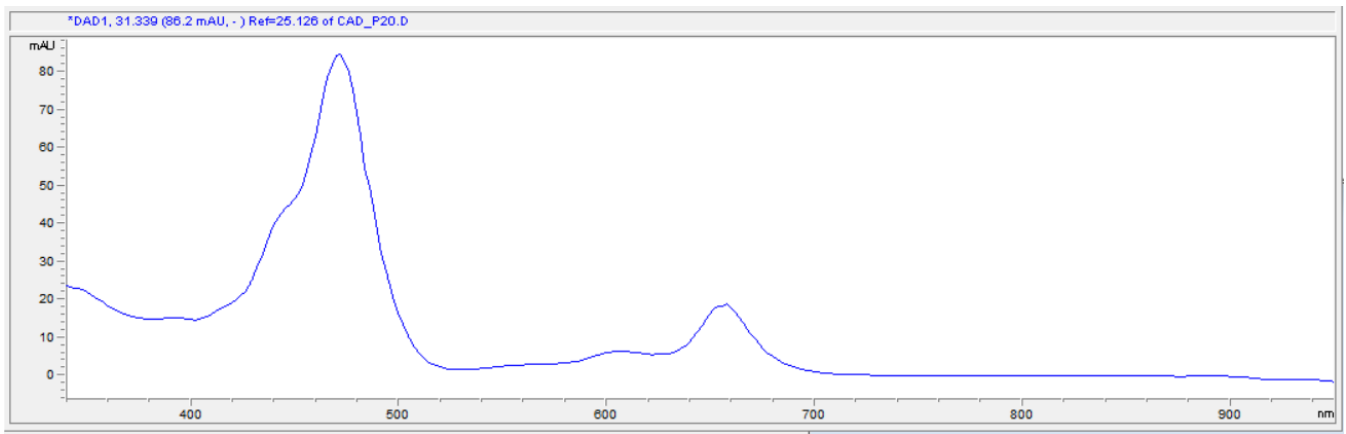

Figure S2: Absorbance spectra obtained from suspected Bphe-*e* (retention time = 31.4 min) in sample 20 (8.9 kyr BP).

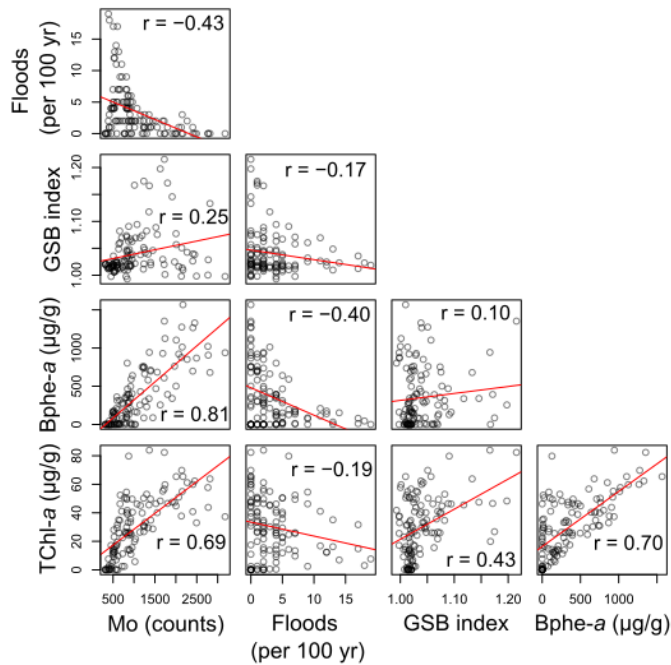

10

Figure S3: Scatterplots of relationships between selected sedimentary variables at Lago Cadagno. Each data point represents the mean of a 100-year interval (n = 125).

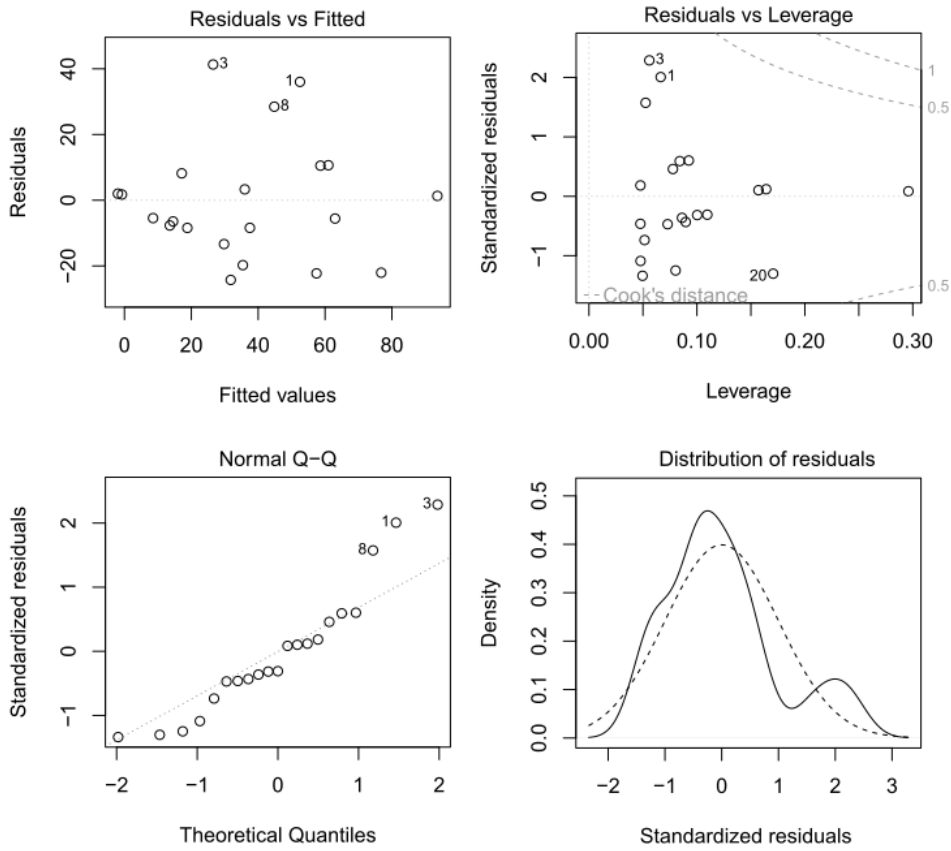

15

**Figure S4: Diagnostic plots for the regression of RABD<sub>842</sub> and Bphe-*a*.** A) Residuals plotted versus fitted values. B) Residuals plotted vs leverage. A 0.5 threshold for Cook's distance is shown as dashed gray lines; no data points exceed the threshold of 0.5. C) Q-Q plot of the residuals. D) Density plot of the residuals (solid line) compared to a normal distribution (dashed line).

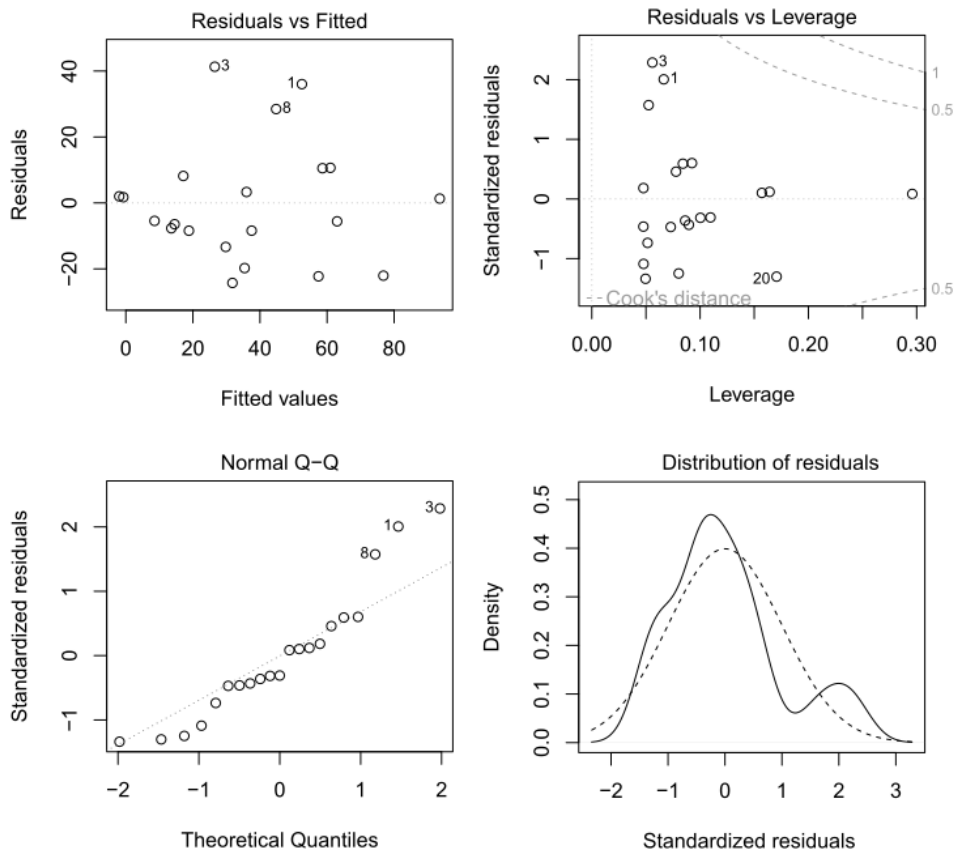

20

**Figure S5: Diagnostic plots for the regression of RABD<sub>670</sub> and TChl. A) Residuals plotted versus fitted values. B) Residuals plotted vs leverage. Cook's distance is shown as dashed gray lines; no data points exceed the threshold of 0.5. C) Q-Q plot of the residuals. D) Density plot of the residuals (solid line) compared to a normal distribution (dashed line).**

**Table S1: Correlation matrix of hyperspectral indices and pigment measurements on extracted samples (n=21). Values shown are Pearson's r correlation coefficient; significant correlations (p < 0.05) are indicated in bold. P-values were calculated using a permutation test (Bishara and Hittner, 2012) with 10,000 permutations, and were corrected using the Benjamini-Hochberg procedure (Benjamini and Hochberg, 1995). The three HSI indices selected for downcore reconstruction are indicated by an asterisk. CR = continuum removal. RABA = relative absorption band area. Numbers given within parenthesis represent the wavelengths used as endpoints to define the absorption band trough.**

|                                                              | RABD670<br>(CR) | RABA640-<br>695 | RABD670<br>(640-765) | *RABD670<br>(640-695) | RABD655-<br>680max<br>(640-695) | RABD655-<br>680max<br>(640-765) | TChl- <i>a</i><br>(Spectro;<br>Jeffrey and<br>Humphrey,<br>1975) | Chl- <i>a</i><br>(Spectro;<br>Overmann<br>and<br>Tilzer,<br>1989) | TChl- <i>a</i><br>(HPLC) | RABD712<br>(CR) | RABA695-<br>765 | RABD715<br>(640-765) | RABD715<br>(695-765) | *RABD710-<br>730max<br>(695-765) | RABD710-<br>730max<br>(640-765) | Bchl- <i>d,-e</i><br>(Spectro;<br>Overmann<br>and<br>Tilzer,<br>1989) | Isorenieratene<br>(HPLC) | *RABD842     | Bphe- <i>a</i><br>(HPLC) | Bphe- <i>a</i><br>(Spectro;<br>Fiedor et<br>al.,<br>2002) |
|--------------------------------------------------------------|-----------------|-----------------|----------------------|-----------------------|---------------------------------|---------------------------------|------------------------------------------------------------------|-------------------------------------------------------------------|--------------------------|-----------------|-----------------|----------------------|----------------------|----------------------------------|---------------------------------|-----------------------------------------------------------------------|--------------------------|--------------|--------------------------|-----------------------------------------------------------|
| RABD655-680max<br>(CR)                                       | <b>0.979</b>    | <b>0.876</b>    | <b>0.930</b>         | <b>0.720</b>          | <b>0.768</b>                    | <b>0.948</b>                    | <b>0.774</b>                                                     | <b>0.738</b>                                                      | <b>0.627</b>             | <b>0.815</b>    | <b>0.481</b>    | <b>0.665</b>         | 0.446                | <b>0.485</b>                     | <b>0.699</b>                    | <b>0.618</b>                                                          | <b>0.646</b>             | 0.420        | 0.289                    | 0.336                                                     |
| RABD670 (CR)                                                 |                 | <b>0.907</b>    | <b>0.954</b>         | <b>0.704</b>          | <b>0.741</b>                    | <b>0.965</b>                    | <b>0.697</b>                                                     | <b>0.677</b>                                                      | <b>0.642</b>             | <b>0.798</b>    | 0.450           | <b>0.655</b>         | 0.404                | 0.433                            | <b>0.686</b>                    | <b>0.508</b>                                                          | <b>0.618</b>             | 0.345        | 0.214                    | 0.256                                                     |
| RABA640-695                                                  |                 |                 | <b>0.926</b>         | <b>0.796</b>          | <b>0.794</b>                    | <b>0.933</b>                    | <b>0.705</b>                                                     | <b>0.721</b>                                                      | <b>0.718</b>             | <b>0.505</b>    | 0.238           | 0.414                | 0.157                | 0.190                            | 0.440                           | 0.379                                                                 | <b>0.528</b>             | 0.346        | 0.288                    | 0.326                                                     |
| RABD670 (640-765)                                            |                 |                 |                      | <b>0.707</b>          | <b>0.705</b>                    | <b>0.995</b>                    | <b>0.619</b>                                                     | <b>0.583</b>                                                      | <b>0.588</b>             | <b>0.718</b>    | <b>0.538</b>    | <b>0.714</b>         | 0.475                | <b>0.491</b>                     | <b>0.732</b>                    | <b>0.528</b>                                                          | <b>0.697</b>             | 0.224        | 0.130                    | 0.145                                                     |
| *RABD670 (640-695)                                           |                 |                 |                      |                       | <b>0.980</b>                    | <b>0.710</b>                    | <b>0.755</b>                                                     | <b>0.753</b>                                                      | <b>0.815</b>             | 0.332           | 0.097           | 0.205                | -0.013               | 0.037                            | 0.237                           | 0.470                                                                 | 0.143                    | 0.459        | 0.436                    | 0.466                                                     |
| RABD655-680max<br>(640-695)                                  |                 |                 |                      |                       |                                 | <b>0.727</b>                    | <b>0.824</b>                                                     | <b>0.825</b>                                                      | <b>0.798</b>             | 0.419           | 0.117           | 0.229                | 0.020                | 0.086                            | 0.271                           | <b>0.500</b>                                                          | 0.166                    | <b>0.558</b> | <b>0.498</b>             | <b>0.552</b>                                              |
| RABD655-680max<br>(640-765)                                  |                 |                 |                      |                       |                                 |                                 | <b>0.666</b>                                                     | <b>0.634</b>                                                      | <b>0.589</b>             | <b>0.737</b>    | <b>0.531</b>    | <b>0.702</b>         | 0.470                | <b>0.496</b>                     | <b>0.725</b>                    | <b>0.541</b>                                                          | <b>0.703</b>             | 0.289        | 0.183                    | 0.210                                                     |
| TChl- <i>a</i> (Spectro;<br>Jeffrey and<br>Humphrey, 1975)   |                 |                 |                      |                       |                                 |                                 |                                                                  | <b>0.981</b>                                                      | <b>0.711</b>             | <b>0.531</b>    | 0.215           | 0.275                | 0.164                | 0.246                            | 0.324                           | <b>0.681</b>                                                          | 0.410                    | <b>0.824</b> | <b>0.784</b>             | <b>0.819</b>                                              |
| Chl- <i>a</i> (Spectro;<br>Overmann and Tilzer,<br>1989)     |                 |                 |                      |                       |                                 |                                 |                                                                  |                                                                   | <b>0.766</b>             | 0.443           | 0.075           | 0.154                | 0.017                | 0.102                            | 0.205                           | <b>0.527</b>                                                          | 0.306                    | <b>0.819</b> | <b>0.797</b>             | <b>0.844</b>                                              |
| TChl- <i>a</i> (HPLC)                                        |                 |                 |                      |                       |                                 |                                 |                                                                  |                                                                   |                          | 0.237           | -0.143          | 0.047                | -0.223               | -0.191                           | 0.081                           | 0.227                                                                 | 0.013                    | 0.398        | <b>0.498</b>             | 0.473                                                     |
| RABD712 (CR)                                                 |                 |                 |                      |                       |                                 |                                 |                                                                  |                                                                   |                          |                 | <b>0.760</b>    | <b>0.875</b>         | <b>0.774</b>         | <b>0.797</b>                     | <b>0.900</b>                    | <b>0.661</b>                                                          | <b>0.715</b>             | 0.360        | 0.157                    | 0.184                                                     |
| RABA695-765                                                  |                 |                 |                      |                       |                                 |                                 |                                                                  |                                                                   |                          |                 |                 | <b>0.935</b>         | <b>0.979</b>         | <b>0.977</b>                     | <b>0.926</b>                    | <b>0.669</b>                                                          | <b>0.807</b>             | 0.118        | -0.016                   | -0.048                                                    |
| RABD715 (640-765)                                            |                 |                 |                      |                       |                                 |                                 |                                                                  |                                                                   |                          |                 |                 |                      | <b>0.937</b>         | <b>0.927</b>                     | <b>0.998</b>                    | <b>0.637</b>                                                          | <b>0.821</b>             | 0.054        | -0.089                   | -0.117                                                    |
| RABD715 (695-765)                                            |                 |                 |                      |                       |                                 |                                 |                                                                  |                                                                   |                          |                 |                 |                      |                      | <b>0.993</b>                     | <b>0.928</b>                    | <b>0.661</b>                                                          | <b>0.810</b>             | 0.092        | -0.054                   | -0.090                                                    |
| *RABD710-730max<br>(695-765)                                 |                 |                 |                      |                       |                                 |                                 |                                                                  |                                                                   |                          |                 |                 |                      |                      |                                  | <b>0.924</b>                    | <b>0.703</b>                                                          | <b>0.816</b>             | 0.185        | 0.027                    | 0.005                                                     |
| RABD710-730max<br>(640-765)                                  |                 |                 |                      |                       |                                 |                                 |                                                                  |                                                                   |                          |                 |                 |                      |                      |                                  |                                 | <b>0.653</b>                                                          | <b>0.819</b>             | 0.100        | -0.051                   | -0.070                                                    |
| Bchl- <i>d,-e</i> (Spectro;<br>Overmann and Tilzer,<br>1989) |                 |                 |                      |                       |                                 |                                 |                                                                  |                                                                   |                          |                 |                 |                      |                      |                                  |                                 |                                                                       | <b>0.658</b>             | <b>0.513</b> | 0.419                    | 0.396                                                     |
| Isorenieratene<br>(HPLC)                                     |                 |                 |                      |                       |                                 |                                 |                                                                  |                                                                   |                          |                 |                 |                      |                      |                                  |                                 |                                                                       |                          | 0.219        | 0.109                    | 0.091                                                     |
| *RABD842                                                     |                 |                 |                      |                       |                                 |                                 |                                                                  |                                                                   |                          |                 |                 |                      |                      |                                  |                                 |                                                                       |                          |              | <b>0.926</b>             | <b>0.959</b>                                              |
| Bphe- <i>a</i> (HPLC)                                        |                 |                 |                      |                       |                                 |                                 |                                                                  |                                                                   |                          |                 |                 |                      |                      |                                  |                                 |                                                                       |                          |              |                          | <b>0.972</b>                                              |

## References

- Benjamini, Y. and Hochberg, Y.: Controlling the False Discovery Rate: A Practical and Powerful Approach to Multiple Testing, *Journal of the Royal Statistical Society: Series B (Methodological)*, 57, 289–300, <https://doi.org/10.1111/j.2517-6161.1995.tb02031.x>, 1995.
- 30 Bishara, A. J. and Hittner, J. B.: Testing the significance of a correlation with nonnormal data: Comparison of Pearson, Spearman, transformation, and resampling approaches., *Psychological Methods*, 17, 399–417, <https://doi.org/10.1037/a0028087>, 2012.
